# Supplementary material
Source: PubMed Central journal article supplement (PMC9989349)
Supplement: web_material_kwac104.pdf [file web_material_kwac104.pdf]

## Web Material

Comparative Effectiveness of Direct-Acting Antivirals for Posttraumatic Stress Disorder in VA Patients with Hepatitis C Virus Infection

Brian Shiner, Krista Huybrechts, Jiang Gui, Luke Rozema MS, Jenna Forehand, Bradley V. Watts, Tammy Jiang, Jessica E. Hoyt, Jack Esteves, Paula P. Schnurr, Kristen Ray, and Jaimie L. Gradus

Contents:

Web Tables 1–3

Web Figures 1–2

| <b>Web Table 1: Patient Selection for Analysis of Direct-Acting Antivirals (DAAs) for Posttraumatic Stress Disorder (PTSD) <sup>a</sup></b> |                                                                                                            |               |
|---------------------------------------------------------------------------------------------------------------------------------------------|------------------------------------------------------------------------------------------------------------|---------------|
| <b>Question</b>                                                                                                                             |                                                                                                            | <b>Answer</b> |
| A                                                                                                                                           | How many Department of Veterans Affairs (VA) patients had any diagnosis of PTSD between FY2000 and FY2019? | 2,098,389     |
| B                                                                                                                                           | How many patients from (A) also had a diagnosis of Hepatitis C Virus (HCV)?                                | 146,915       |
| C                                                                                                                                           | How many patients from (B) received at least one prescription of a DAA for HCV?                            | 47,220        |
| D                                                                                                                                           | How many patients from (C) received at least one prescription for GLE/PIB, LDV/SOF, or SOF/VEL?            | 36,347        |
| E                                                                                                                                           | How many prescriptions from (D) followed a 6-month washout of that medication?                             | 37,825        |
| F                                                                                                                                           | How many prescriptions from (E) were continued for at least 56 days?                                       | 26,443        |
| G                                                                                                                                           | How many starts from (F) had a PTSD Checklist (PCL) within 90 days prior to start.                         | 1,063         |
| H                                                                                                                                           | How many starts from (G) had a PCL within 90 days after the 28-day point?                                  | 253           |
| Detailed Information from (H): Person Trials from All Potential Patients                                                                    |                                                                                                            |               |
|                                                                                                                                             | GLE/PIB                                                                                                    | LDV/SOF       |
|                                                                                                                                             | 54                                                                                                         | 145           |
|                                                                                                                                             |                                                                                                            | SOF/VEL       |
|                                                                                                                                             |                                                                                                            | 54            |
| <sup>a</sup> GLE/PIB = Glecaprevir/Pibrentasvir, LDV/SOF = Ledipasvir/Sofosbuvir, SOF/VEL = Sofosbuvir/Velpatasvir                          |                                                                                                            |               |

| <b>Web Table 2. Assessment of Potential Confounding, as Measured by Standardized Mean Difference<sup>a,b</sup></b> |                             |                               |                               |                               |
|--------------------------------------------------------------------------------------------------------------------|-----------------------------|-------------------------------|-------------------------------|-------------------------------|
| <b>Association</b>                                                                                                 | <b>Outcome</b>              | <b>Exposure</b>               |                               |                               |
| <b>Variable</b>                                                                                                    | <b>15-Point Improvement</b> | <b>GLE/PIB versus LDV/SOF</b> | <b>GLE/PIB versus SOF/VEL</b> | <b>SOF/VEL versus LDV/SOF</b> |
| <b>Hepatitis Disease Status</b>                                                                                    |                             |                               |                               |                               |
| Thousands of Days Since HCV Diagnosis                                                                              | 0.01                        | 0.26                          | 0.18                          | 0.43                          |
| <b>Fibrosis (FIB-4 Score)</b>                                                                                      |                             |                               |                               |                               |
| Mild (<1.45)                                                                                                       | 0.29                        | 0.15                          | 0.19                          | 0.35                          |
| Moderate (≥1.45 and ≤3.25)                                                                                         | 0.28                        | 0.18                          | 0.21                          | 0.39                          |
| Advanced (>3.25)                                                                                                   | 0.04                        | 0.05                          | 0.00                          | 0.05                          |
| <b>PTSD Treatment History</b>                                                                                      |                             |                               |                               |                               |
| Thousands of Days since PTSD Diagnosis                                                                             | 0.08                        | 0.14                          | 0.02                          | 0.15                          |
| Number of Prior EBA Trials                                                                                         | 0.20                        | 0.09                          | 0.22                          | 0.12                          |
| Number of Prior EBP Trials                                                                                         | 0.07                        | 0.05                          | 0.05                          | 0.00                          |
| <b>PCL Timing, Version, and Severity</b>                                                                           |                             |                               |                               |                               |
| Days from DAA Start to Earliest Baseline PCL                                                                       | 0.16                        | 0.46                          | 0.20                          | 0.25                          |
| Days from Baseline PCL to Follow-Up PCL                                                                            | 0.22                        | 0.21                          | 0.07                          | 0.13                          |
| Days from DAA End to Follow-Up PCL                                                                                 | 0.09                        | 0.31                          | 0.54                          | 0.26                          |
| Baseline PCL                                                                                                       | 0.50                        | 0.04                          | 0.15                          | 0.11                          |
| Baseline PCL Score ≥31                                                                                             | 0.37                        | 0.02                          | 0.22                          | 0.20                          |
| <b>Concurrent Treatment</b>                                                                                        |                             |                               |                               |                               |
| Sessions of EBP for PTSD                                                                                           | 0.25                        | 0.19                          | 0.14                          | 0.05                          |
| Weeks of EBA for PTSD                                                                                              | 0.08                        | 0.01                          | 0.24                          | 0.25                          |
| Any Non-EBA Antidepressant                                                                                         | 0.10                        | 0.42                          | 0.35                          | 0.07                          |
| Any Anticonvulsant                                                                                                 | 0.30                        | 0.04                          | 0.10                          | 0.06                          |
| Any Sedative/Hypnotics                                                                                             | 0.40                        | 0.54                          | 0.00                          | 0.54                          |
| Any Opioid                                                                                                         | 0.26                        | 0.15                          | 0.27                          | 0.42                          |
| Any Atypical Antipsychotic                                                                                         | 0.09                        | 0.14                          | 0.17                          | 0.04                          |
| Any Prazosin                                                                                                       | 0.23                        | 0.36                          | 0.04                          | 0.32                          |
| Any FDA Approved Medications for AUD                                                                               | 0.28                        | 0.35                          | 0.10                          | 0.26                          |
| Any Opioid Agonist Therapy                                                                                         | 0.09                        | 0.29                          | 0.23                          | 0.06                          |
| <b>Patient Characteristics at Baseline</b>                                                                         |                             |                               |                               |                               |
| Age                                                                                                                | 0.09                        | 0.20                          | 0.32                          | 0.52                          |
| Women                                                                                                              | 0.19                        | 0.32                          | 0.38                          | 0.07                          |
| Married                                                                                                            | 0.04                        | 0.11                          | 0.14                          | 0.25                          |
| Rural                                                                                                              | 0.24                        | 0.14                          | 0.05                          | 0.19                          |
| White Non-Hispanic                                                                                                 | 0.05                        | 0.22                          | 0.04                          | 0.26                          |
| Black Non-Hispanic                                                                                                 | 0.04                        | 0.19                          | 0.14                          | 0.33                          |
| Hispanic                                                                                                           | 0.16                        | 0.25                          | 0.20                          | 0.06                          |
| Other Racial or Ethnic Group                                                                                       | 0.05                        | 0.21                          | 0.00                          | 0.21                          |
| Combat Exposure                                                                                                    | 0.02                        | 0.15                          | 0.08                          | 0.07                          |
| Sexual Trauma while in Military                                                                                    | 0.14                        | 0.03                          | 0.09                          | 0.06                          |
| VA Disability Level 70% or Greater                                                                                 | 0.12                        | 0.17                          | 0.30                          | 0.13                          |
| <b>Service Use Characteristics in the 1 Year Preceding Baseline</b>                                                |                             |                               |                               |                               |
| Number of PTSD Outpatient Clinical Team Visits                                                                     | 0.25                        | 0.30                          | 0.30                          | 0.04                          |
| Number of Outpatient Mental Health Visits                                                                          | 0.07                        | 0.17                          | 0.13                          | 0.29                          |
| Number of Outpatient Substance Abuse Visits                                                                        | 0.10                        | 0.21                          | 0.02                          | 0.21                          |
| Number of Outpatient Primary Care Visits                                                                           | 0.33                        | 0.65                          | 0.26                          | 0.38                          |
| Number of Outpatient Specialty Medical Visits                                                                      | 0.10                        | 0.12                          | 0.22                          | 0.14                          |

|                                                                                                                                                                                                                                                                                                                                                                                                |      |      |      |      |
|------------------------------------------------------------------------------------------------------------------------------------------------------------------------------------------------------------------------------------------------------------------------------------------------------------------------------------------------------------------------------------------------|------|------|------|------|
| Number of ED Visits for Psychiatric Indication                                                                                                                                                                                                                                                                                                                                                 | 0.25 | 0.47 | 0.18 | 0.56 |
| Days of Acute Inpatient Mental Health                                                                                                                                                                                                                                                                                                                                                          | 0.15 | 0.35 | 0.02 | 0.37 |
| Days of Residential PTSD Treatment                                                                                                                                                                                                                                                                                                                                                             | 0.07 | 0.08 | 0.09 | 0.15 |
| Days Residential Substance Abuse Treatment                                                                                                                                                                                                                                                                                                                                                     | 0.03 | 0.62 | 0.36 | 0.29 |
| <b>Comorbidities in the 2 Years Preceding Baseline</b>                                                                                                                                                                                                                                                                                                                                         |      |      |      |      |
| Number of Non-PTSD MH Comorbidities                                                                                                                                                                                                                                                                                                                                                            | 0.08 | 0.37 | 0.17 | 0.21 |
| Substance Use Disorders                                                                                                                                                                                                                                                                                                                                                                        | 0.29 | 0.64 | 0.27 | 0.41 |
| Depressive Disorders                                                                                                                                                                                                                                                                                                                                                                           | 0.10 | 0.11 | 0.09 | 0.02 |
| Anxiety Disorders                                                                                                                                                                                                                                                                                                                                                                              | 0.14 | 0.28 | 0.19 | 0.09 |
| Number of Non-PTSD PH Comorbidities                                                                                                                                                                                                                                                                                                                                                            | 0.02 | 0.04 | 0.11 | 0.16 |
| Non-HCV Liver Disease                                                                                                                                                                                                                                                                                                                                                                          | 0.31 | 0.50 | 0.13 | 0.38 |
| Uncomplicated Hypertension                                                                                                                                                                                                                                                                                                                                                                     | 0.17 | 0.04 | 0.15 | 0.20 |
| Obesity                                                                                                                                                                                                                                                                                                                                                                                        | 0.08 | 0.27 | 0.29 | 0.02 |
| <sup>a</sup> DAA=Direct-Acting Antiviral; PTSD=posttraumatic stress disorder; VA=Department of Veterans Affairs; HCV=Hepatitis C Virus; EBA=Evidence-Based Antidepressant; EBP=Evidence-Based Psychotherapy PCL=PTSD Checklist; MH=Mental Health; PH=Physical Health<br><sup>b</sup> Covariates associated with both the outcome and exposure (SMD $\geq$ 0.2) are indicated by the gray rows. |      |      |      |      |

| <b>Web Table 3. Confounders Included in Propensity Weighting Model <sup>a b</sup></b>                                                                                                                                                                                         |                                       |                                       |                                       |                                       |                                       |                                       |
|-------------------------------------------------------------------------------------------------------------------------------------------------------------------------------------------------------------------------------------------------------------------------------|---------------------------------------|---------------------------------------|---------------------------------------|---------------------------------------|---------------------------------------|---------------------------------------|
| <b>Association</b>                                                                                                                                                                                                                                                            | <b>Before Weighting</b>               |                                       |                                       | <b>After Weighting</b>                |                                       |                                       |
| <b>Variable</b>                                                                                                                                                                                                                                                               | <b>GLE/PIB<br/>versus<br/>LDV/SOF</b> | <b>GLE/PIB<br/>versus<br/>SOF/VEL</b> | <b>SOF/VEL<br/>versus<br/>LDV/SOF</b> | <b>GLE/PIB<br/>versus<br/>LDV/SOF</b> | <b>GLE/PIB<br/>versus<br/>SOF/VEL</b> | <b>SOF/VEL<br/>versus<br/>LDV/SOF</b> |
| Mild Fibrosis                                                                                                                                                                                                                                                                 | 0.15                                  | 0.19                                  | 0.35                                  | 0.01                                  | 0.12                                  | 0.13                                  |
| Moderate Fibrosis                                                                                                                                                                                                                                                             | 0.18                                  | 0.21                                  | 0.39                                  | 0.13                                  | 0.03                                  | 0.15                                  |
| Number of Prior EBA Trials                                                                                                                                                                                                                                                    | 0.09                                  | 0.22                                  | 0.12                                  | 0.01                                  | 0.13                                  | 0.12                                  |
| Days from Baseline PCL to Follow-Up PCL                                                                                                                                                                                                                                       | 0.21                                  | 0.07                                  | 0.13                                  | 0.09                                  | 0.02                                  | 0.07                                  |
| Baseline PCL Score ≥31                                                                                                                                                                                                                                                        | 0.02                                  | 0.22                                  | 0.20                                  | 0.02                                  | 0.18                                  | 0.16                                  |
| Any Concurrent Opioid                                                                                                                                                                                                                                                         | 0.15                                  | 0.27                                  | 0.42                                  | 0.06                                  | 0.16                                  | 0.23                                  |
| Any Concurrent Prazosin                                                                                                                                                                                                                                                       | 0.36                                  | 0.04                                  | 0.32                                  | 0.21                                  | 0.10                                  | 0.32                                  |
| Any Concurrent FDA Approved Medications for AUD                                                                                                                                                                                                                               | 0.35                                  | 0.10                                  | 0.26                                  | 0.19                                  | 0.01                                  | 0.18                                  |
| Prior Year PTSD Outpatient Clinical Team Visits                                                                                                                                                                                                                               | 0.30                                  | 0.30                                  | 0.04                                  | 0.19                                  | 0.17                                  | 0.00                                  |
| Prior Year Outpatient Primary Care Visits                                                                                                                                                                                                                                     | 0.65                                  | 0.26                                  | 0.38                                  | 0.40                                  | 0.24                                  | 0.15                                  |
| Prior Year ED Visits for Psychiatric Indication                                                                                                                                                                                                                               | 0.47                                  | 0.18                                  | 0.56                                  | 0.10                                  | 0.12                                  | 0.21                                  |
| Non-HCV Liver Disease Diagnosis in Prior Two Years                                                                                                                                                                                                                            | 0.50                                  | 0.13                                  | 0.38                                  | 0.19                                  | 0.06                                  | 0.25                                  |
| <sup>a</sup> PTSD=posttraumatic stress disorder; HCV=Hepatitis C Virus; EBA=Evidence-Based Antidepressant; PCL=PTSD Checklist; ED=Emergency Department<br><sup>b</sup> Confounders not balanced by the propensity weighting model (SMD ≥ 0.2) are indicated by the gray rows. |                                       |                                       |                                       |                                       |                                       |                                       |

Web Figure 1. Identification of the Analytic Cohort <sup>a</sup>

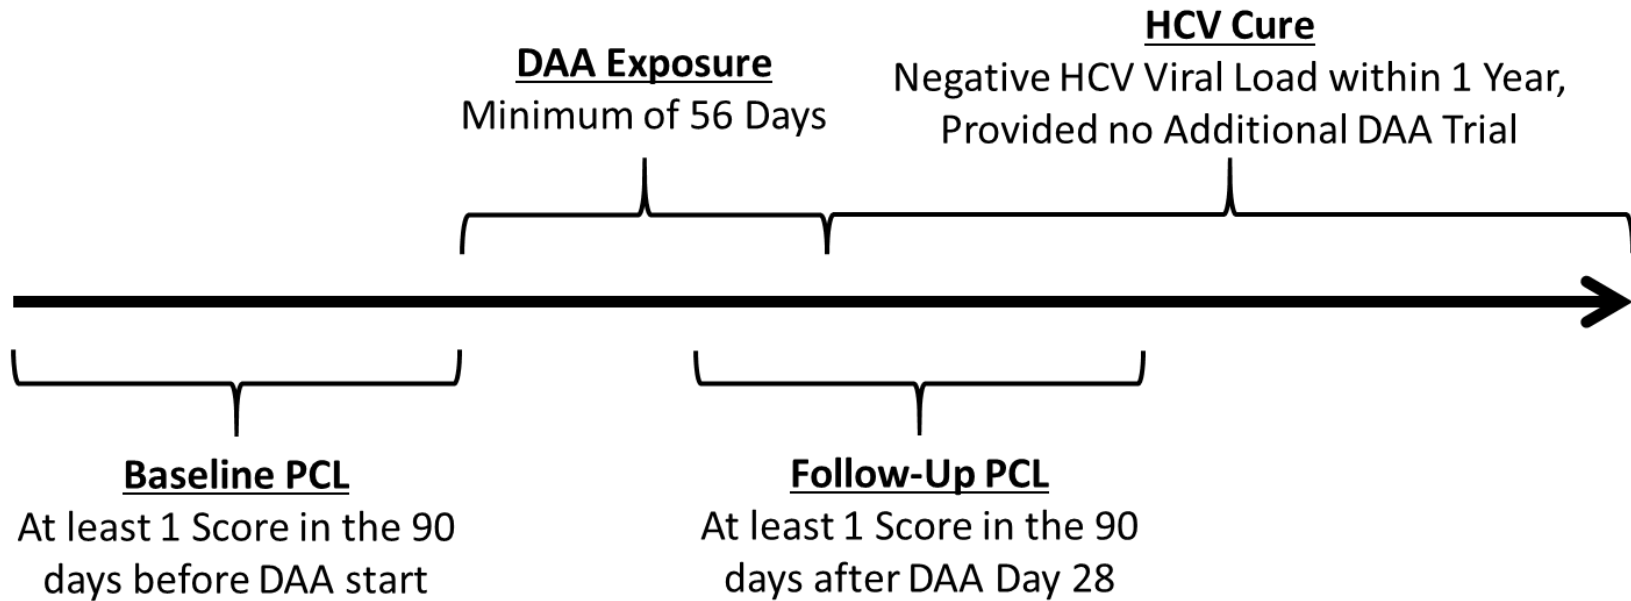

<sup>a</sup> DAA=Direct-Acting Antiviral, HCV=Hepatitis C Virus, PCL=PTSD Checklist

Web Figure 2. Propensity Score Distribution <sup>a</sup>

### GLE/PIB Propensity Scores by Treatment Group

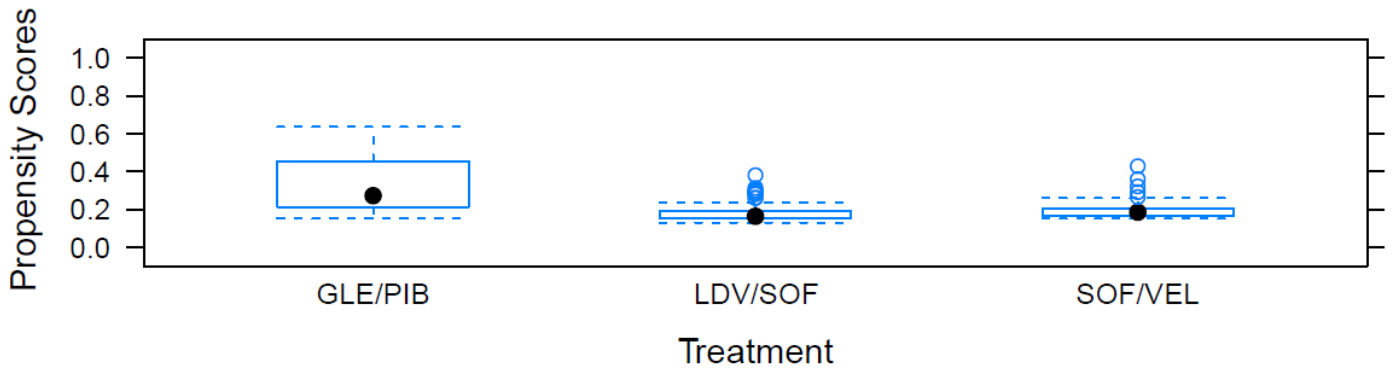

### LDV/SOF Propensity Scores by Treatment Group

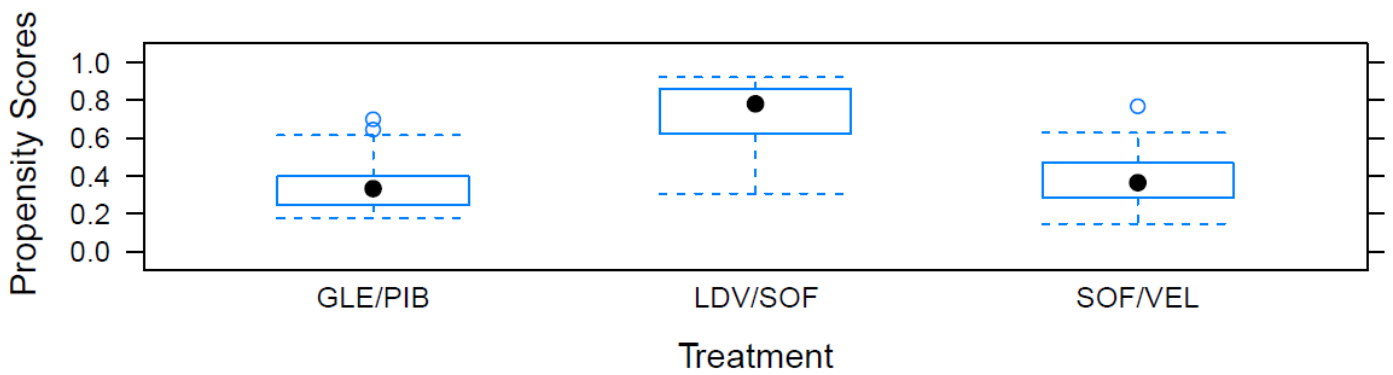

### SOF/VEL Propensity Scores by Treatment Group

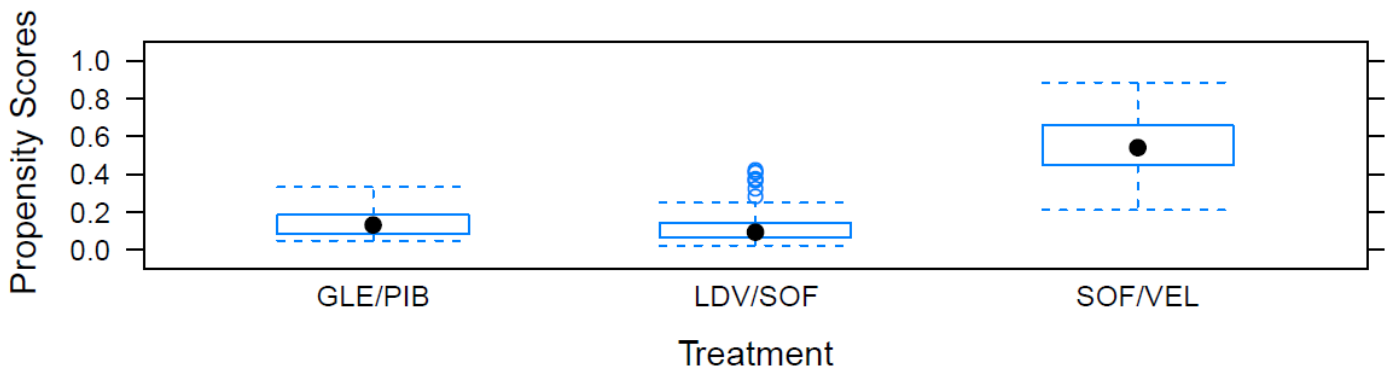

<sup>a</sup> GLE/PIB = Glecaprevir/Pibrentasvir, LDV/SOF = Ledipasvir/Sofosbuvir, SOF/VEL = Sofosbuvir/Velpatasvir
